# Supplementary material
Source: PubMed Central journal article supplement (PMC7255143)
Supplement: mmc1.pdf [file mmc1.pdf]

# THE LANCET

## Respiratory Medicine

### Supplementary appendix

This appendix formed part of the original submission and has been peer reviewed. We post it as supplied by the authors.

Supplement to: Fox SE, Akmatbekov A, Harbert JL, Li G, Brown LQ, Vander Heide RS. Pulmonary and cardiac pathology in African American patients with COVID-19: an autopsy series from New Orleans. *Lancet Respir Med* 2020; published online May 27. [https://doi.org/10.1016/S2213-2600\(20\)30243-5](https://doi.org/10.1016/S2213-2600(20)30243-5).

## Supplementary Appendix:

### Table of Contents:

1. **Supplementary Methods**
2. **Supplementary Tables**
  - a. **Table S1: Patient Medical History**
  - b. **Table S2: Patient Antemortem Laboratory Values**
  - c. **Table S3: BMI and Organ Weights**
3. **Supplementary Figures**
  - a. **Figure S1: Immunostains of Pulmonary Tissue**
  - b. **Figure S2: Electron Microscopy and Von Willebrand Factor Stain**
4. **Supplemental References**

### Supplementary Methods:

**Fluorescence imaging of DNA and RNA content.** In order to assess relative distribution of dsDNA versus RNA in tissue sections, DRAQ5 and SYTO RNASelect staining was performed on adjacent tissue sections. DRAQ5 (DR51000, Biostatus, Ltd.) is a far-red fluorescent, small molecule anthraquinone derivative that binds stoichiometrically and with high affinity to dsDNA in live or fixed cells, with negligible binding to RNA. SYTO RNASelect (S32703, Thermo Fisher Scientific) is a green-fluorescent cell-permeant nucleic acid stain that selectively binds RNA. Unstained FFPE sections were deparaffinized in xylene (196279, Fisher Scientific), and then rehydrated in a series of ethanol/PBS dilutions. Hydrated tissue sections were then stained with SYTO RNASelect (50  $\mu$ M) for 10 minutes, rinsed in deionized water, followed by DRAQ5 (50  $\mu$ M) for 10 minutes, and a final rinse in deionized water. Stained sections were then lightly air-dried then immediately cleared with xylene, and mounted with Canada balsam mounting medium (IS5015, Aldon Corporation). Slides were scanned for fluorescence in a Zeiss AxioScan Z1 whole slide scanner at  $\times$ 20 magnification, using 488 nm excitation for SYTO RNASelect, and 639 nm excitation for DRAQ5.

**Supplementary Tables:**

**Table S1: Patient Medical History**

| Patient (age)         | Medical History | Home Medications               | Additional Hospital Treatment | Reported Days Ill Prior to Admission | Time on Ventilator | Time from Admission to Death |
|-----------------------|-----------------|--------------------------------|-------------------------------|--------------------------------------|--------------------|------------------------------|
| <b>Patient 1 (44)</b> | HTN             | Allopurinol                    | Azithromycin                  | 3 days                               | 6 days             | 8 days                       |
|                       | DM2             | Amlodipine                     | Cefepime                      |                                      |                    |                              |
|                       | CKD 3           | Aspirin 325mg                  | Vancomycin                    |                                      |                    |                              |
|                       |                 | Atorvastatin                   |                               |                                      |                    |                              |
|                       |                 | Hydrochlorothiazide            |                               |                                      |                    |                              |
|                       |                 | Insulin glargine 44U           |                               |                                      |                    |                              |
|                       |                 | Lisinopril                     |                               |                                      |                    |                              |
| <b>Patient 2 (44)</b> | DM2             | Lisinopril                     | Azithromycin                  | 6 days                               | 2 days             | 5 days                       |
|                       | HTN             | Glyburide                      | Cefepime                      |                                      |                    |                              |
|                       | CHF             | Metformin                      | Vancomycin                    |                                      |                    |                              |
|                       |                 | Metronidazole                  |                               |                                      |                    |                              |
|                       |                 | Fluticasone                    |                               |                                      |                    |                              |
|                       |                 | Aspirin 81mg                   |                               |                                      |                    |                              |
| <b>Patient 3 (63)</b> | HTN             | Amlodipin                      | Azithromycin                  | 7 days                               | 25 days            | 25 days                      |
|                       | Thyroidectomy   | Aspirin 81mg                   | Cefepime                      |                                      |                    |                              |
|                       |                 | Cyclobenzapine                 | Vancomycin                    |                                      |                    |                              |
|                       |                 | Levothyroxine                  | Dexamethasone                 |                                      |                    |                              |
|                       |                 | Lisinopril-hydrochlorothiazide |                               |                                      |                    |                              |
|                       |                 | Oxybutynin                     |                               |                                      |                    |                              |
| <b>Patient 4 (76)</b> | HTN             | Amlodipine                     | Azithromycin                  | 3 days                               | 6 days             | 6 days                       |

|                       |                                                                      |                                                                                                                                                       |                                                           |        |         |         |
|-----------------------|----------------------------------------------------------------------|-------------------------------------------------------------------------------------------------------------------------------------------------------|-----------------------------------------------------------|--------|---------|---------|
|                       | DM2<br>Rheumatoid arthritis                                          | Losartan<br>Duloxetine<br>Insulin<br>Methotrexate                                                                                                     | Cefepime<br>Vancomycin                                    |        |         |         |
| <b>Patient 5 (68)</b> | DM2                                                                  | N/A                                                                                                                                                   | Dextrose<br>Hydroxychloroquine<br>Insulin<br>Pantoprazole | 1 day  | 9 days  | 9 days  |
| <b>Patient 6 (78)</b> | N/A                                                                  | N/A                                                                                                                                                   | Insulin<br>Phenylephrine                                  | 7 days | 0 days  | 0 days  |
| <b>Patient 7 (53)</b> | HTN<br>Polymyositis<br>OSA                                           | Alendronate<br>Amlodipine<br>Coreg<br>Citalopram<br>Ergocalciferol<br>Losartan<br>Methotrexate<br>Omeprazole<br>Prednisone<br>Pregabalin<br>Trazodone | Enoxaparin<br>Cefepime<br>Levophed                        | 0 days | 1 day   | 1 day   |
| <b>Patient 8 (60)</b> | COPD<br>HTN<br>Atrial fibrillation<br>Post-intubation cardiac arrest | Aspirin<br>Brimonidine<br>Dorzolamide<br>Ergocalciferol                                                                                               | Furosemide<br>Acetaminophen<br>Albuterol<br>Amiodarone    | 3 days | 14 days | 14 days |

|                        |             |                                                                                     |                                                                                                           |        |         |         |
|------------------------|-------------|-------------------------------------------------------------------------------------|-----------------------------------------------------------------------------------------------------------|--------|---------|---------|
|                        |             | Flucanazole<br>Ketorolac<br>Lisinopril<br>Metoprolol<br>Pantoprazole<br>Pravastatin | Aspirin<br>Fentanyl<br>Enoxaparin<br>Ipratropium<br>Hydroxychloroquine                                    |        |         |         |
| <b>Patient 9 (66)</b>  | HTN         | N/A                                                                                 | Azithromycin<br>Ceftriaxone<br>Enoxaparin<br>Pantoprazole<br>Propofol<br>Norephinephrine<br>Cisatracurium | 2 days | 12 days | 12 days |
| <b>Patient 10 (78)</b> | ESRD<br>DM2 | N/A                                                                                 | Vancomycin<br>Clopidogrel<br>Pantoprazole                                                                 | 2 days | 2 days  | 2 days  |

\*HTN = hypertension, DM2 = Type II diabetes mellitus, CKD (2/3) = chronic kidney disease (stage 2/3), OSA – obstructive sleep apnea, COPD = chronic obstructive pulmonary disease, ESRD = end-stage renal disease, N/A = unable to obtain prior medication history

**Table S2: Patient Antemortem Laboratory Values**

|                   | <i>N</i><br>1.8-8.00<br>(10 <sup>3</sup> /uL) | <i>L</i><br>1.1-5.0<br>(10 <sup>3</sup> /uL) | <i>Pl</i><br>130-400<br>(10 <sup>3</sup> /uL) | <i>PT/PTT</i><br>(10-13/24-37s)    | <i>D-Dimer</i><br>(<250ng/mL)                    | <i>Fibrinogen</i><br>200-600<br>(mg/dL) | <i>BNP</i><br>(<100pg/mL)     | <i>Trop I</i><br>(<=0.08ng/mL)      | <i>Glu (65-99mg/dL)</i> | <i>AST</i><br>(<45U/L) | <i>Cr</i><br>0.7-1.4<br>(mg/dL) |
|-------------------|-----------------------------------------------|----------------------------------------------|-----------------------------------------------|------------------------------------|--------------------------------------------------|-----------------------------------------|-------------------------------|-------------------------------------|-------------------------|------------------------|---------------------------------|
| <b>Patient 1</b>  | 20.20                                         | 0.4                                          | 288                                           | 13.8/38.4                          | 1110                                             | >700                                    | 628<br>(7 days before death)  | up to 0.16<br>(7 days before death) | 294                     | 500                    | 9.09                            |
| <b>Patient 2</b>  | 16.3                                          | 1.0                                          | 208                                           | Not done                           | Not done                                         | Not done                                | 42<br>(3 days before death)   | 4.19<br>(3 days before death)       | 235                     | 37                     | 3.28                            |
| <b>Patient 3</b>  | 12.30                                         | 0.92                                         | 309                                           | Not done                           | Not done                                         | Not done                                | 76<br>(13 days before death)  | 76<br>(12 days before death)        | 392                     | 17                     | 6.48                            |
| <b>Patient 4</b>  | 10.90                                         | 0.90                                         | 113                                           | 13.9 (no PTT)                      | 249<br>(6 days before death)                     | Not done                                | 76<br>(6 days before death)   | <0.02<br>(6 days before death)      | 347                     | 56                     | 3.01                            |
| <b>Patient 5</b>  | 19.3                                          | 1.03                                         | 80                                            | Not done                           | Not done                                         | Not done                                | 52<br>(9 days before death)   | 0.6<br>(9 days before death)        | 217                     | 24                     | 9.74                            |
| <b>Patient 6</b>  | 6.3                                           | 0.81                                         | 134                                           | 14.0/29.8                          | 8197                                             | Not done                                | 378                           | 0.03                                | 575                     | 39                     | 1.26                            |
| <b>Patient 7</b>  | 4.0                                           | 2.70                                         | 128                                           | 11.5/29.4                          | 47559                                            | Not done                                | 88                            | <0.02                               | 121                     | 357                    | 0.43                            |
| <b>Patient 8</b>  | 6.8                                           | 0.4                                          | 290                                           | 9.9/24.3<br>(12 days before death) | *2.06<br>(ref: 0.19 - 0.5 ug/mL)<br>*outside lab | Not done                                | 1466<br>(4 days before death) | 0.2<br>(4 days before death)        | 140                     | 21                     | 0.74                            |
| <b>Patient 9</b>  | 22.32                                         | 0.7                                          | 531                                           | Not done                           | Not done                                         | Not done                                | 106<br>(12 days before death) | <0.02<br>(12 days before death)     | 204.                    | 18                     | 4.24                            |
| <b>Patient 10</b> | 14.38                                         | 0.56                                         | 153                                           | 12.1/ND                            | 10020<br>(2 days before death)                   | Not done                                | 939<br>(2 days before death)  | 61.53                               | 145                     | 1771                   | 10.2                            |

*N* = neutrophils, *L* = lymphocytes, *P* = platelets, **Glu** = glucose, ND = not done; all values from within 24 hours of death unless otherwise noted

**Table S3: BMI and Organ Weights**

| Patient # | BMI (kg/m <sup>2</sup> ) | Heart (g)*<br>nl: 300 (270-360) | Left Lung (g)<br>nl: 375 (325-480) <sup>1</sup> | Right Lung (g)<br>nl: 450 (360-570) <sup>1</sup> |
|-----------|--------------------------|---------------------------------|-------------------------------------------------|--------------------------------------------------|
| 1         | 37.5                     | N/A                             | 1050                                            | 1030                                             |
| 2         | 47.76                    | 420                             | 750                                             | 800                                              |
| 3         | 56.97                    | 550                             | 680                                             | 940                                              |
| 4         | 38.15                    | 540                             | 860                                             | 860                                              |
| 5         | 35.75                    | 480                             | 950                                             | 1140                                             |
| 6         | 33.1                     | 370                             | 660                                             | 670                                              |
| 7         | 28.5                     | 420                             | 300                                             | 305                                              |
| 8         | 44.8                     | 450                             | 890                                             | 1040                                             |
| 9         | 28.3                     | 340                             | 660                                             | 550                                              |
| 10        | 34.3                     | 600                             | 500                                             | 890                                              |

\*Normal heart weight varies by gender and body length, and full normal values can be referenced in data presented in Finkbeiner et al., 2009.<sup>1</sup>

N/A = not applicable, heart not removed.

**Supplementary Figures:**

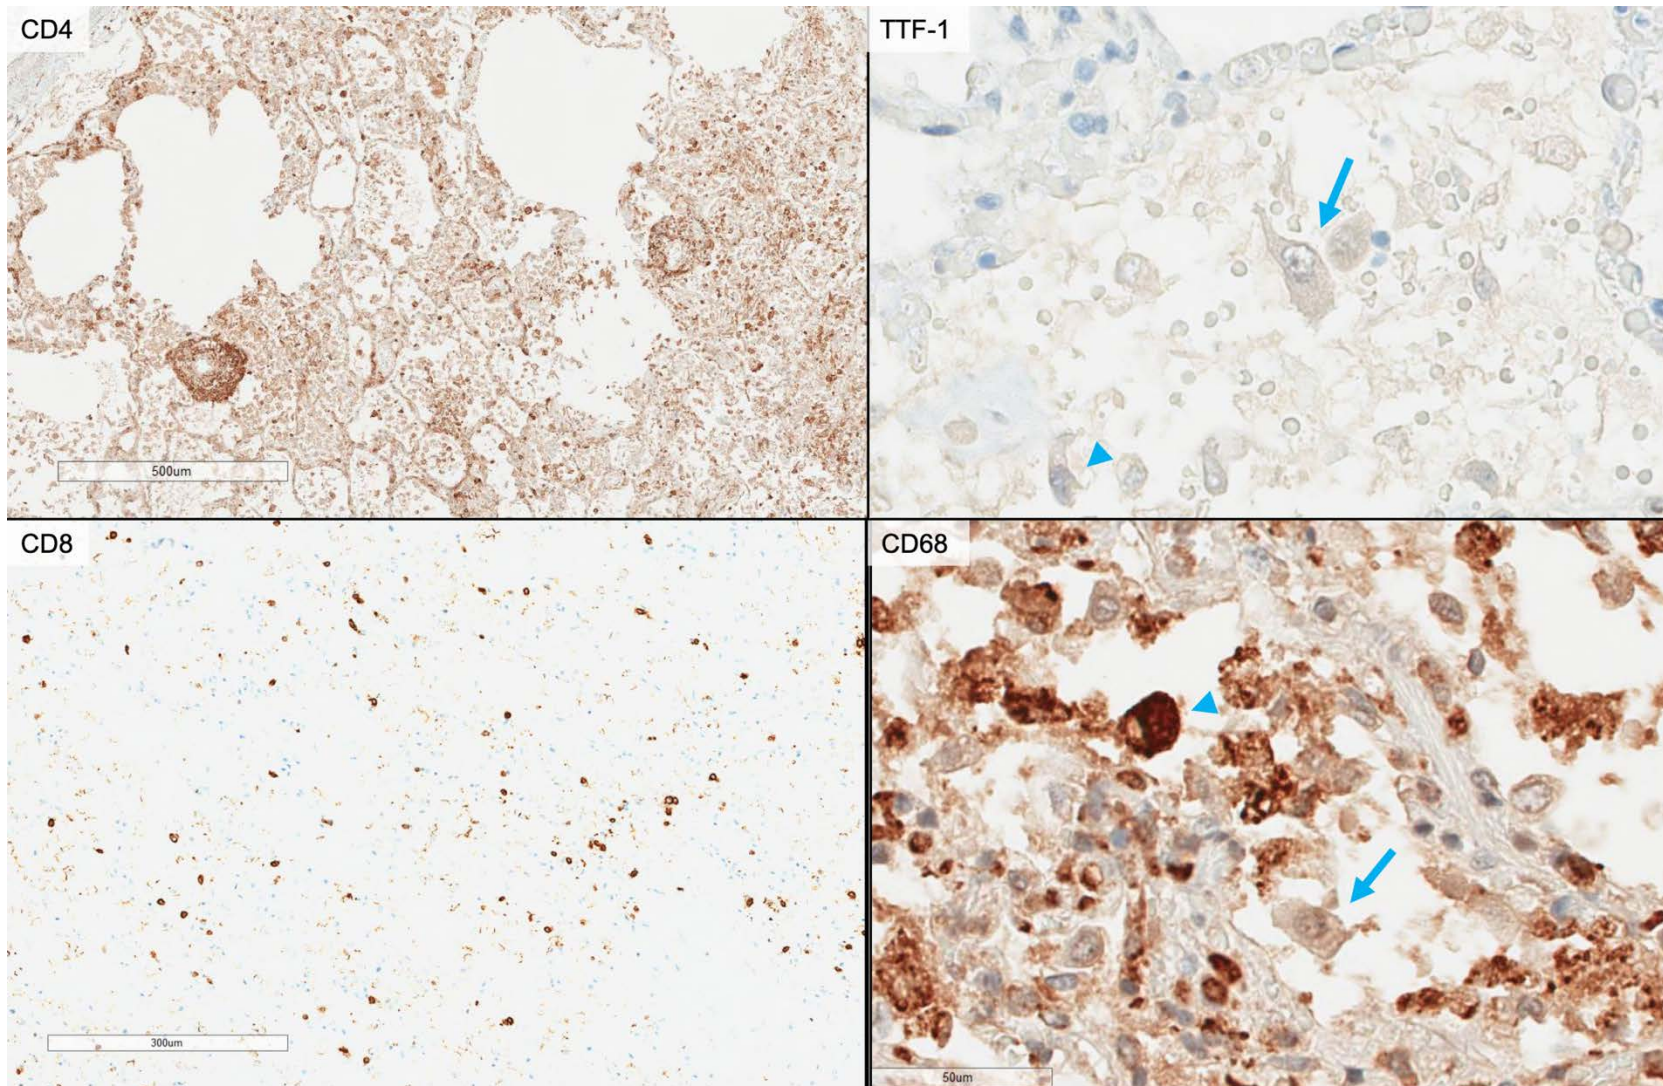

**FIGURE S1: Immunostains of pulmonary tissue.** CD4 and CD8 immunostains highlight lymphocytes, CD4+ cells being visibly more present than CD8+ cells around small airways. A TTF-1 stain shows faint staining of an enlarged, atypical pneumocyte within an alveolar space (blue arrow), with faint staining of additional desquamated pneumocytes (blue arrowhead). A CD68 immunostain highlights alveolar macrophage (blue arrowhead), with background staining of an enlarged pneumocyte (blue arrow) similar to that seen in attached alveolar pneumocytes.



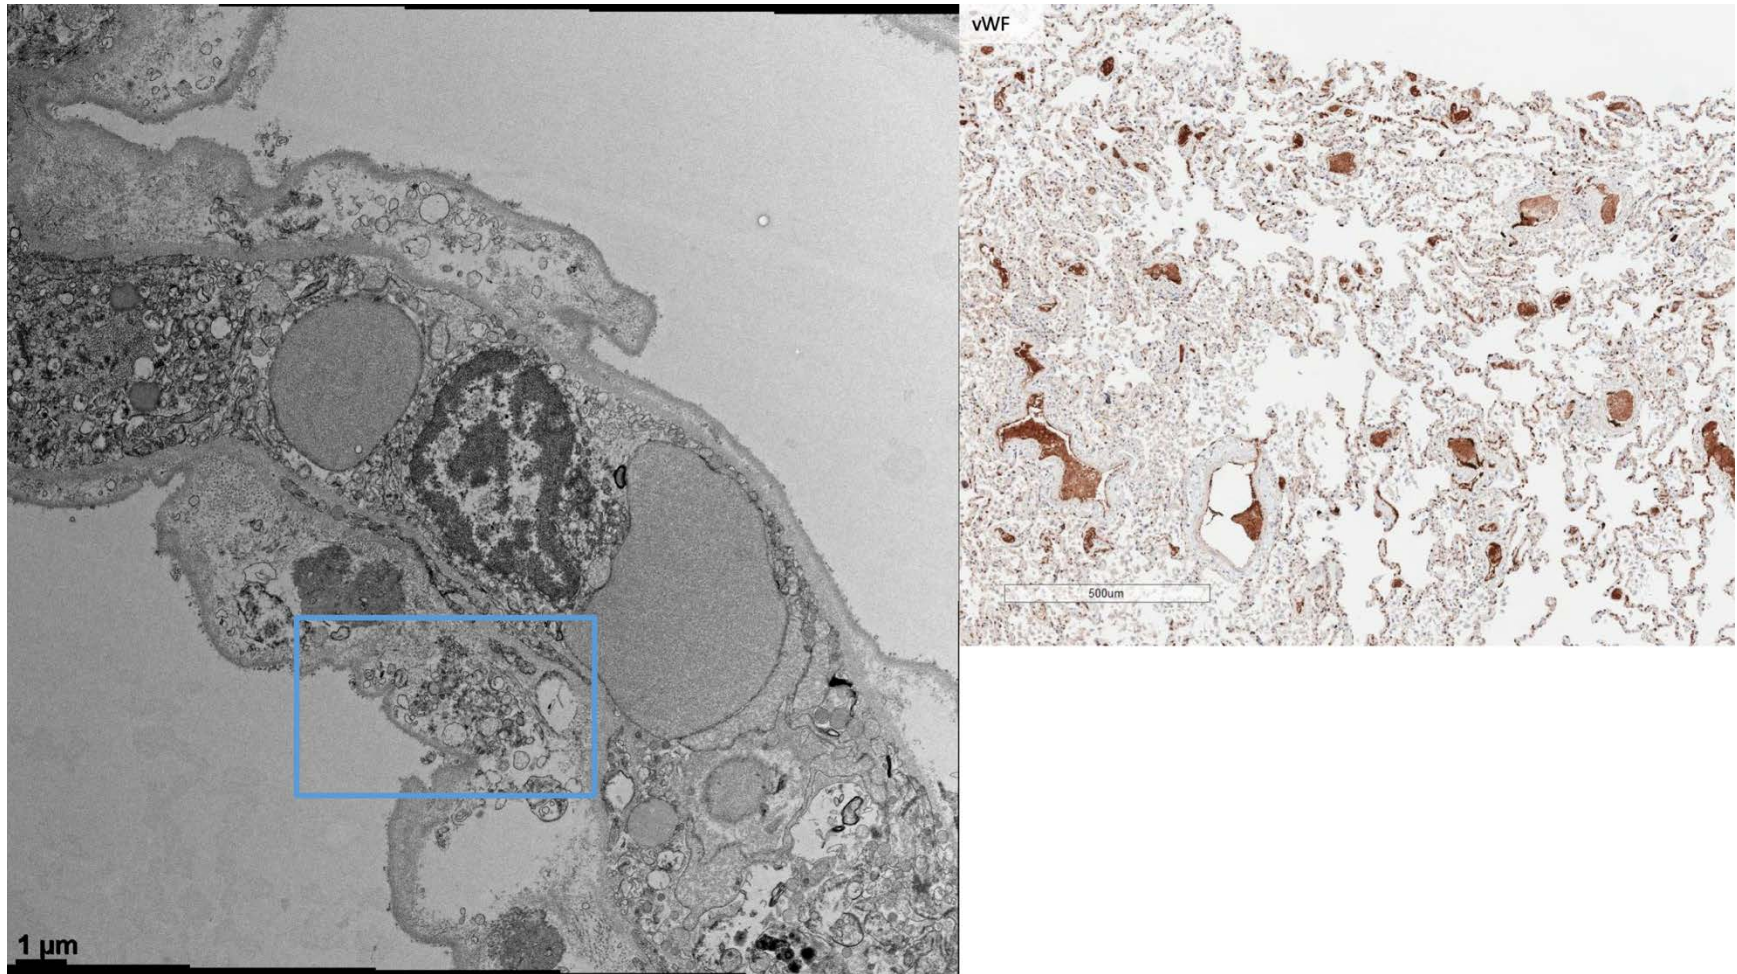

**FIGURE S2: A)** Electron microscopy showing an infected pneumocyte. The region in the blue box is presented in **Figure 4**. A Von Willebrand Factor immunostain is additionally shown, highlighting small arteries and veins with accumulated platelets and megakaryocytes.

**Supplemental References:**

- 1) Finkbeiner WE, Connolly AJ, Ursell PC, Davis RL. Autopsy Pathology: A Manual and Atlas E-Book. Elsevier Health Sciences, 2009.
